# Supplementary material
Source: PubMed Central journal article supplement (PMC5754250)

**A**

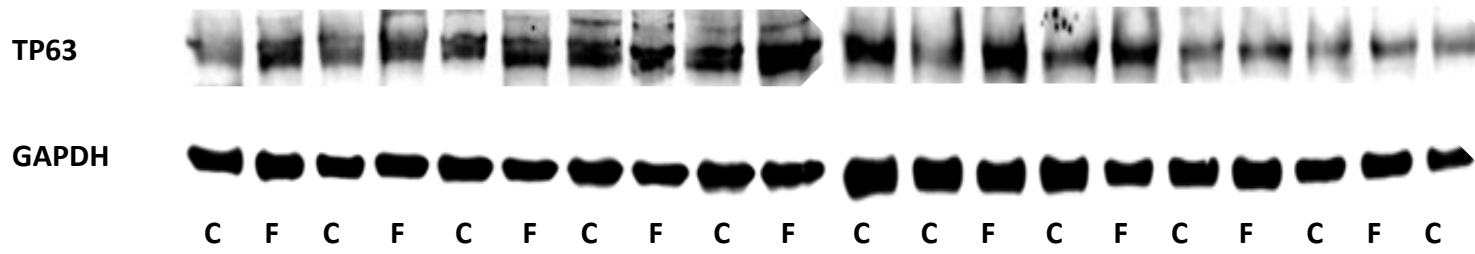

**B**

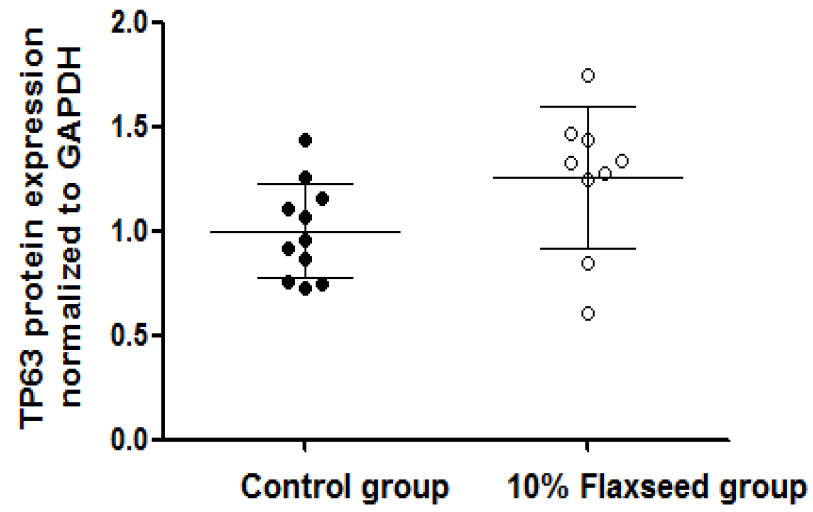

Supplement: NIHMS915918-supplement-5.pdf [file NIHMS915918-supplement-5.pdf]
